# Supplementary material for: High-fiber basil seed flour reduces insulin resistance and hepatic steatosis in high-fat diet mice
Source: PubMed Central journal article supplement — NPJ Sci Food. 2024 Nov 8;8:90. doi: 10.1038/s41538-024-00329-z (PMC11549410; doi:10.1038/s41538-024-00329-z), 2024-11-08
Supplement: 41538_2024_329_MOESM1_ESM.pdf [file 41538_2024_329_MOESM1_ESM.pdf]

1

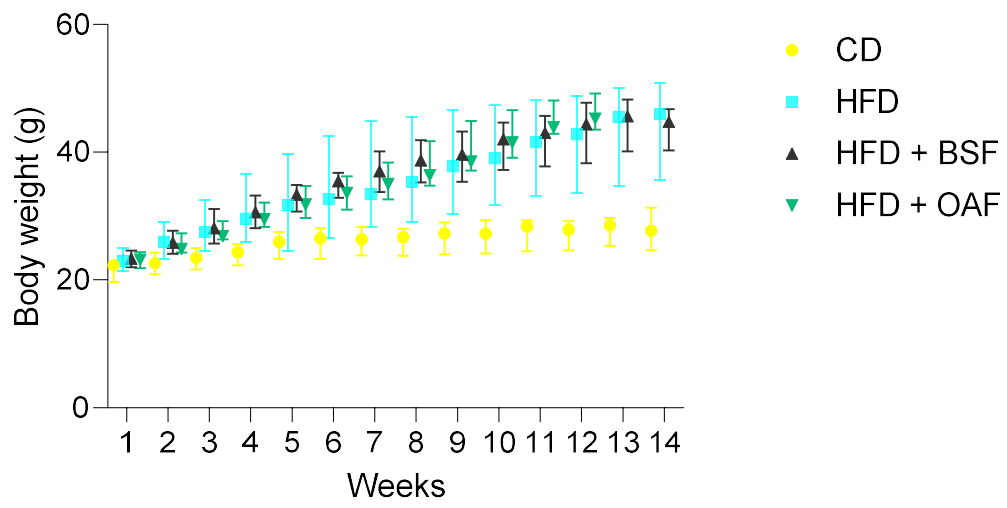

2

3

4 **Supplementary Figure 1.**

5

6 **Table S1.**

| Nutrient (g)            | CD      |        | HFD   |        | HFD + BSF 20 % p/p |        | HFD + OAF 20 % p/p |        |
|-------------------------|---------|--------|-------|--------|--------------------|--------|--------------------|--------|
|                         | g/100 g | kcal   | g     | kcal   | g/100 g            | kcal   | g/100 g            | kcal   |
| Proteins                | 19.20   | 76.80  | 26.20 | 104.80 | 24.61              | 98.44  | 22.93              | 91.73  |
| Lipids                  | 4.30    | 38.70  | 34.90 | 314.10 | 29.33              | 263.93 | 29.69              | 267.19 |
| SFAs                    | 1.01    | 23.50  | 11.24 | 101.16 | 9.59               | 86.29  | 9.70               | 87.27  |
| MUFAs                   | 1.28    | 11.52  | 12.53 | 112.77 | 10.11              | 91.02  | 10.56              | 95.05  |
| PUFAs                   | 2.01    | 18.09  | 11.13 | 100.17 | 9.62               | 86.62  | 9.43               | 84.86  |
| C18:2n-6                | 1.70    | 15.30  | 9.39  | 84.51  | 7.72               | 69.45  | 8.01               | 72.05  |
| C18:3n-3                | 0.09    | 0.81   | 0.66  | 5.94   | 1.04               | 9.37   | 0.54               | 4.89   |
| Available carbohydrates | 67.30   | 269.20 | 26.30 | 105.20 | 21.04              | 84.16  | 33.00              | 131.99 |
| Total dietary fiber     | 5.00    | 10.00  | 5.00  | 10.00  | 15.66              | 31.33  | 6.01               | 12.03  |
| Soluble Fiber           | 0.00    | 0.00   | 0.00  | 0.00   | 1.12               | 2.24   | 0.71               | 1.43   |
| Insoluble fiber         | 5.00    | 10.00  | 5.00  | 10.00  | 14.54              | 29.09  | 5.20               | 10.40  |
| Ash                     | ND      | 0.00   | ND    | 0.00   | 1.79               | 0.00   | 0.64               | 0.00   |
| Moisture                | ND      | 0.00   | ND    | 0.00   | 1.50               | 0.00   | 1.75               | 0.00   |
| TOTAL                   | 96      | 395    | 92    | 534    | 94                 | 478    | 94                 | 503    |

7 Data presented as mean on wet basis. DC, control diet; HFD, high-fat diet; BSF, high-fiber basil seed meal; dietary  
8 OAF, oatmeal. NA, no data; Saturated fatty acids (SFAs) correspond to C4:0, C14:0, C16:0, C18:0, C22:0, C24:0,  
9 monounsaturated fatty acids (MUFAs) correspond to C16:1, C18:1n-9, C22:1n-9, polyunsaturated fatty acids  
10 (PUFAs) correspond to C18:2n-6, C18:3n-6, C18:3n-3, C20:2, C20:3n-6, C22:2.

11

12

13
